# Supplementary material for: Electro-spun poly(lactic acid)/poly(triarylamine)(PLA/PTAA) composite nanofibers with low PLA content for fiber-based electronic applications
Source: Royal Society of Chemistry journal article supplement (doi:10.1039/d3ma00230f), 2023-01-01
Supplement: d3ma00230f1.pdf [file d3ma00230f1.pdf]

## Supplementary Information

### Electro-spun poly(lactic acid)/poly(triarylamine)(PLA/PTAA) composite nanofibers with low PLA content for fiber-based electronic applications

Alejandro J. Cruz-Arzon<sup>1</sup>, Nitza V. Falcón-Cruz<sup>2</sup>, William Serrano-Garcia<sup>3</sup>, Rolando Oyola-Martínez<sup>2</sup>, Nicholas J. Pinto<sup>1</sup>

<sup>1</sup>Department of Physics and Electronics, University of Puerto Rico at Humacao, Humacao, PR 00791

<sup>2</sup> Department of Chemistry, University of Puerto Rico at Humacao, Humacao, PR 00791

<sup>3</sup> Department of Electrical Engineering, University of South Florida, Tampa, Florida, US 33620

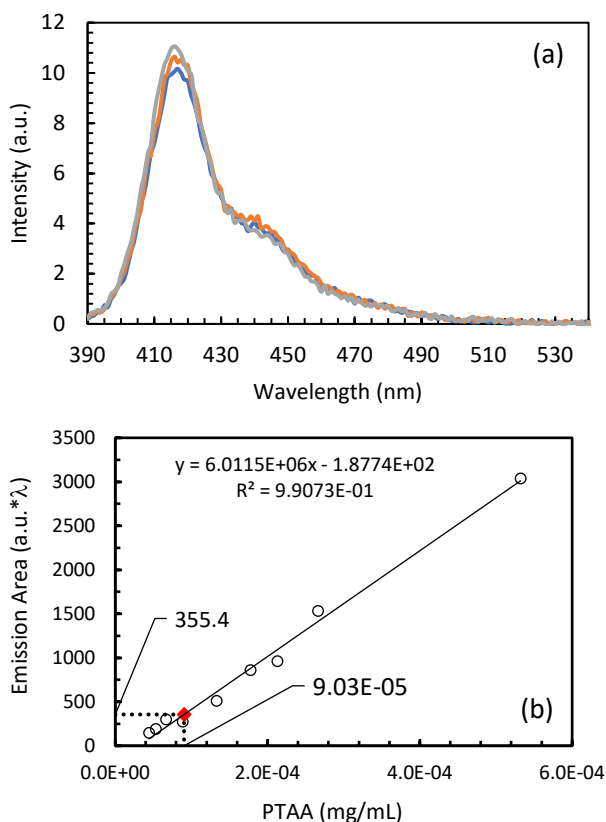

**Fig. S1** (a) Emission spectra of diluted PTAA in CHCl<sub>3</sub> for testing the calibration curve. (b) Emission Acquisition parameters:  $\lambda_{exc} = 375$  nm and  $\lambda_{em} = 390 - 600$  nm, scan rate of 600 nm/min and excitation and emission slits of 5 and 2.5 nm, respectively (red spot). The stock solution is 3.5 mg/mL. The error of determination is 11%.

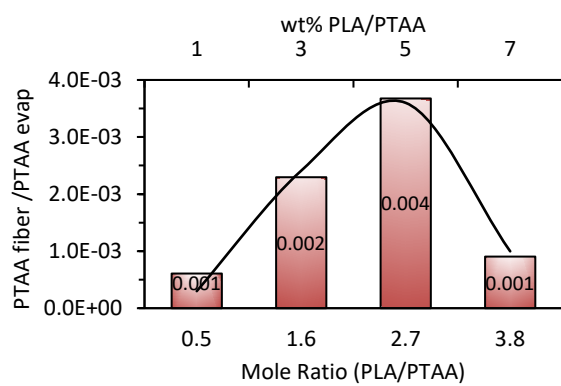

**Fig. S2** PTAA mass in nanofiber relative to the PTAA present just after solvent evaporation for different initial wt% PLA/PTAA.
